# Supplementary material for: Pathogen- and Host-Directed Antileishmanial Effects Mediated by Polyhexanide (PHMB)
Source: PubMed Central journal article supplement (PMC4592236; doi:10.1371/journal.pntd.0004041), 2015-10-02
Supplement: pntd.0004041.s006.pdf [file pntd.0004041.s006.pdf]

**Supplementary Table 1. PHMB:CpG ODN and PHMB concentrations presented in various units.**

**a. PHMB alone**

| IC 50            | IC <sub>50</sub> (μM) | IC <sub>50</sub> (μg/ml) | % (w/v) |
|------------------|-----------------------|--------------------------|---------|
| Promastigotes    | 0.41 ± 0.25           | 1.23±0.75                | 0.0001% |
| Amastigotes      | 4 ± 0.65              | 12±1.95                  | 0.001%  |
| Epithelial cells | 26                    | 78                       | 0.008%  |
| Keratinocytes    | 6.6±3.5               | 19.8±10.5                | 0.002%  |
| BMDM             | 4± 0.7                | 12±2.1                   | 0.001%  |

**b. PHMB/CPG (1:2 w/w; 1:0.34 N/P)**

|               | IC <sub>50</sub> (μM) | IC <sub>50</sub> (μg/ml) | % (w/v) |
|---------------|-----------------------|--------------------------|---------|
| Promastigotes | 2.54 ± 0.5            | 7.62±1.5                 | 0.0008% |
| BMDM          | 134 ± 40.2            | 402±120.6                | 0.04%   |
| Amastigotes   | 1.12 ± 0.23           | 3.36±0.69                | 0.0003% |

**c. PHMB/CPG (1:1 w/w; 1:0.17 N/P)**

|               | IC <sub>50</sub> (μM) | IC <sub>50</sub> (μg/ml) | % (w/v) |
|---------------|-----------------------|--------------------------|---------|
| Promastigotes | 2.2 ± 0.28            | 6.6±0.84                 | 0.0007% |
| BMDM          | 50 ± 10.4             | 150±31.2                 | 0.02%   |
| Amastigotes   | 2.82 ± 2.8            | 8.4±8.4                  | 0.0008% |

**d. PHMB/CpG (2:1 w/w; 1:0.09 N/P)**

|               | IC <sub>50</sub> (μM) | IC <sub>50</sub> (μg/ml) | % (w/v) |
|---------------|-----------------------|--------------------------|---------|
| Promastigotes | 1.45± 0.33            | 4.35± 0.33               | 0.0004% |
| BMDM          | 33 ± 9.5              | 99± 28.5                 | 0.01%   |
| Amastigotes   | 1± 0.55               | 3± 1.65                  | 0.0004% |
